# Supplementary material
Source: PubMed Central journal article supplement (PMC4277216)
Supplement: supp_tpc.114.130443_tpc130443_Supplemental.pdf [file supp_tpc.114.130443_tpc130443_Supplemental.pdf]

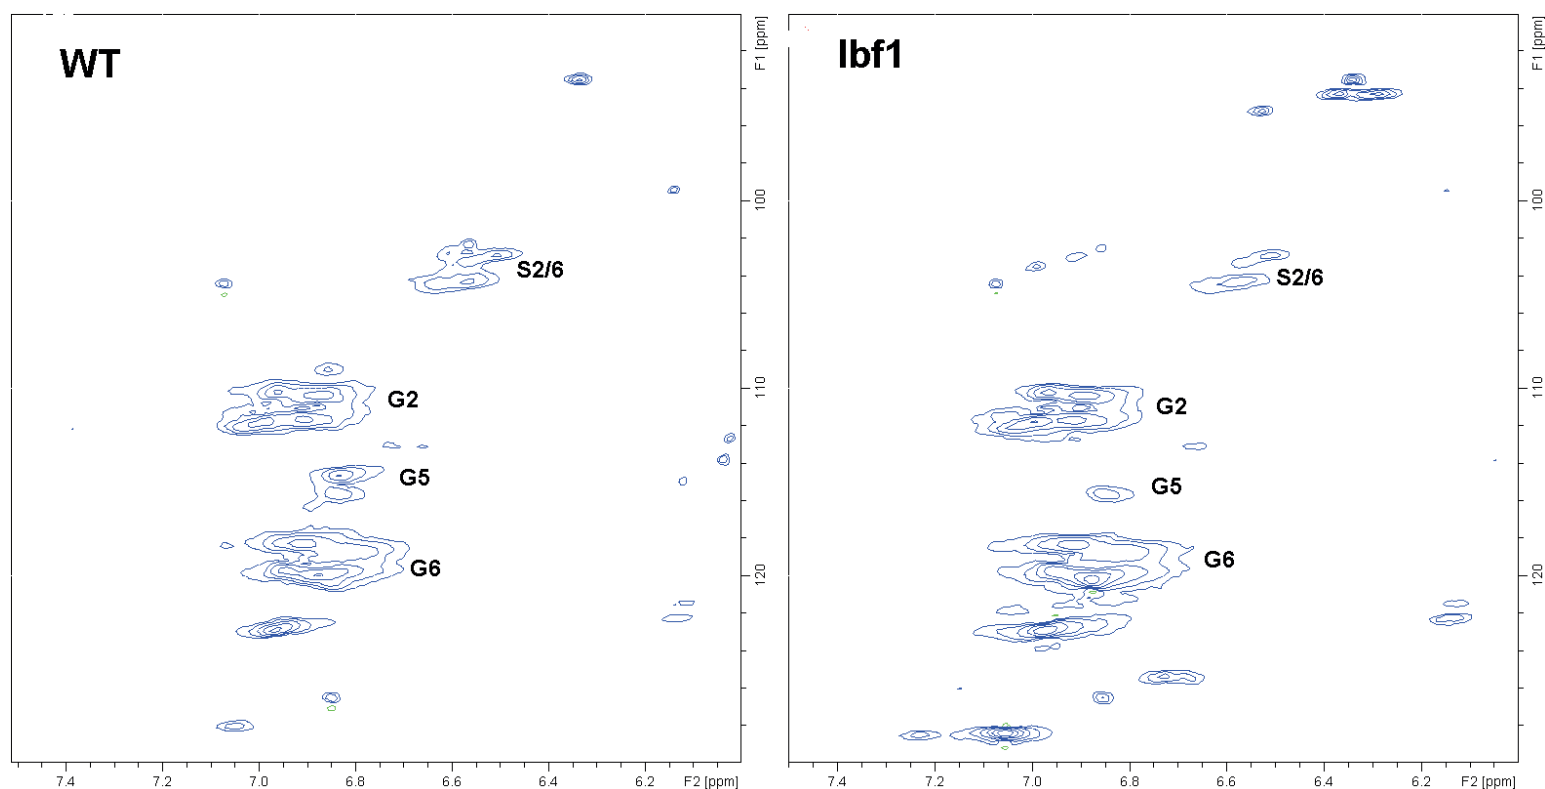

**Supplemental Figure 1** : 2D NMR spectra revealing lignin monomer units from WT (left) and *lbf1* (right) inner tissues. Guaiacyl units (G2, G5, G6) and syringyl units (S2/6).

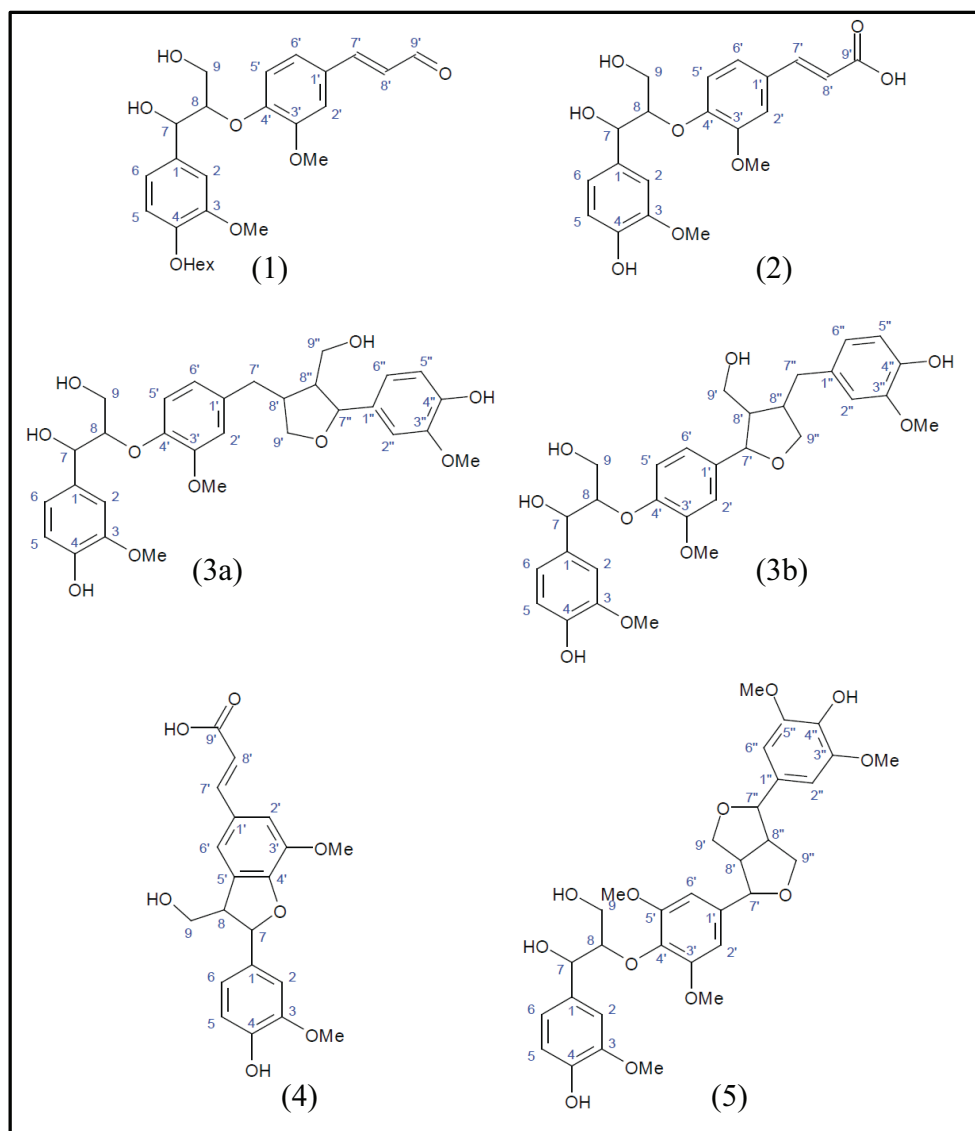

**Supplemental Figure 2:** Structures of oligolignols previously unidentified in flax

**Compound 1. G(8-O-4)G' hex**

At 12.88 min, a peak eluted with an  $m/z$  value of 595.20111 ( $C_{28}H_{35}O_{14}$ ). Its  $MS^2$  spectrum indicated that the compound appeared as acetate adduct (loss of 60 Da). A further loss of a hexose moiety (162 Da) yielded the peak at  $m/z$  373.  $MS^3$  fragmentation of this first product ion lead to second product ions at  $m/z$  355 and 325 due to the loss of water (18 Da) and the combined loss of water and formaldehyde (48 Da), i.e. characteristic pathway I cleavages of a  $\beta$ -aryl ether linkage (AE I ions). The pathway II-typical cleavages yielded ions at  $m/z$  195 (AE II A<sup>-</sup>) and  $m/z$  177 (AE II B<sup>-</sup>), where the latter fragment dissociated further by methyl radical loss (15 Da), yielding a peak at  $m/z$  162. This pathway II fragmentation pattern indicated that a G unit was connected via an 8–O–4-linkage to a coniferaldehyde unit. As this compound was mainly detected as the acetate adduct, the hexoside likely resides on a phenolic function of the aglycone. Two other isomers of this compound eluted at 13.30 min and 14.90 min.

Compound 2. G(e8-O-4)FA

An  $m/z$  389.12219 ( $C_{20}H_{21}O_8^-$ ) peak appeared at 16.70 min. The  $MS^2$  spectrum showed product ions at  $m/z$  371, 359 and 341 due to the loss of water (18 Da), formaldehyde (30 Da) and the combined loss of water and formaldehyde (48 Da), i.e. characteristic pathway I cleavages of a  $\beta$ -aryl ether linkage (AE I ions). The pathway II-typical cleavages yielded ions at  $m/z$  195 (AE II A $^-$ ) and  $m/z$  193 (AE II B $^-$ ). Further fragmentation of the AE II B $^-$  yielded ions at  $m/z$  178, 149 and 134. This was confirmed by  $MS^3$  fragmentation of the  $m/z$  193 fragment, indicating that a G unit was connected via an 8-O-4-linkage to a ferulic acid moiety. The  $MS^2$  spectrum of this compound was dominated by the fragment at  $m/z$  193 whereas in another isomer of this compound, eluting at 16.18 min, the  $MS^2$  spectrum was dominated by the fragment at  $m/z$  341. Therefore we conclude that the isomer eluting at 16.70 min is the erythro isomer and the isomer eluting at 16.18 min is the threo isomer.

Compounds 3. G(t8-O-4)lariciresinol : G(t8-O-4)G<sup>red</sup>(8-8)G (3a) or G(t8-O-4)G(8-8)G<sup>red</sup> (3b)

At 22.79 min, a peak eluted with an  $m/z$  value of 555.22101 ( $C_{30}H_{35}O_{10}^-$ ). Its mass and  $MS^2$  spectrum correspond to G(e8-O-4)G<sup>red</sup>(8-8)G which was described previously in flax stem tissues (Huis et al., 2012). However, in the  $MS^2$  spectrum of this compound, the peak at  $m/z$  507, resulting from combined loss of water and formaldehyde (48 Da) characteristic for the pathway I cleavage of a  $\beta$ -aryl ether linkage, strongly dominated. We therefore conclude that this compound is the threo isomer : G(t8-O-4)G<sup>red</sup>(8-8)G or G(t8-O-4)G(8-8)G<sup>red</sup>.

Compound 4. G(8-5)FA

A peak with  $m/z$  371.11249 ( $C_{20}H_{19}O_7^-$ ) eluted at 23.65 min. Water (-18 Da) and formaldehyde (-30 Da) loss in the  $MS^2$  spectrum explains the product ions at  $m/z$  353 and 341 that are typical for a phenylcoumaran (Morreel et al., 2010a). The pathway II fragmentation leads to ions at  $m/z$  191 (PC II, [M-H-CO<sub>2</sub>-A] $^-$ ) and  $m/z$  235 (PC II, B $^-$ ), typical for a coniferyl alcohol linked via a phenylcoumaran linkage to a ferulic acid moiety (Morreel et al., 2010a). The hexosylated form of this compound was described previously in flax stem tissues (Huis et al., 2012).

Compounds 5. G(t8-O-4)S(8-8)S and G(e8-O-4)S(8-8)S

At 27.55 min, a compound with  $m/z$  613.22601 ( $C_{32}H_{37}O_{12}$ ) eluted. The  $MS^2$  product ions at  $m/z$  595 and 565 were due to the loss of water (18 Da) and the combined loss of water and formaldehyde (48 Da), i.e. characteristic pathway I cleavages of a  $\beta$ -aryl ether linkage (AE I ions). The dominance of the fragment at  $m/z$  565 in the  $MS^2$  spectrum indicated that the linkage was in the threo form. The pathway II cleavages yielded ions at  $m/z$  417 (AE II B $^-$ ) and  $m/z$  387 (AE II B $^-$  - CH<sub>2</sub>O), corresponding to an S(8-8)S moiety, and an ion at  $m/z$  195 (AE II A $^-$ ) indicating that a coniferyl alcohol was linked via the t8-O-4 linkage to the S(8-8)S moiety. This was further confirmed by the ions at  $m/z$  403 and  $m/z$  373, which corresponded to the ions AE II C $^-$  and AE, II, C $^-$  - CH<sub>2</sub>O respectively, formed by the characteristic fragmentation pathway of X(8-O-4)X-containing trilignols (Morreel et al., 2010b). Another isomer of this compound, which eluted at 28.86 min and in which the ion at  $m/z$  417 dominated the  $MS^2$  spectrum was elucidated as the erythro version of this compound.

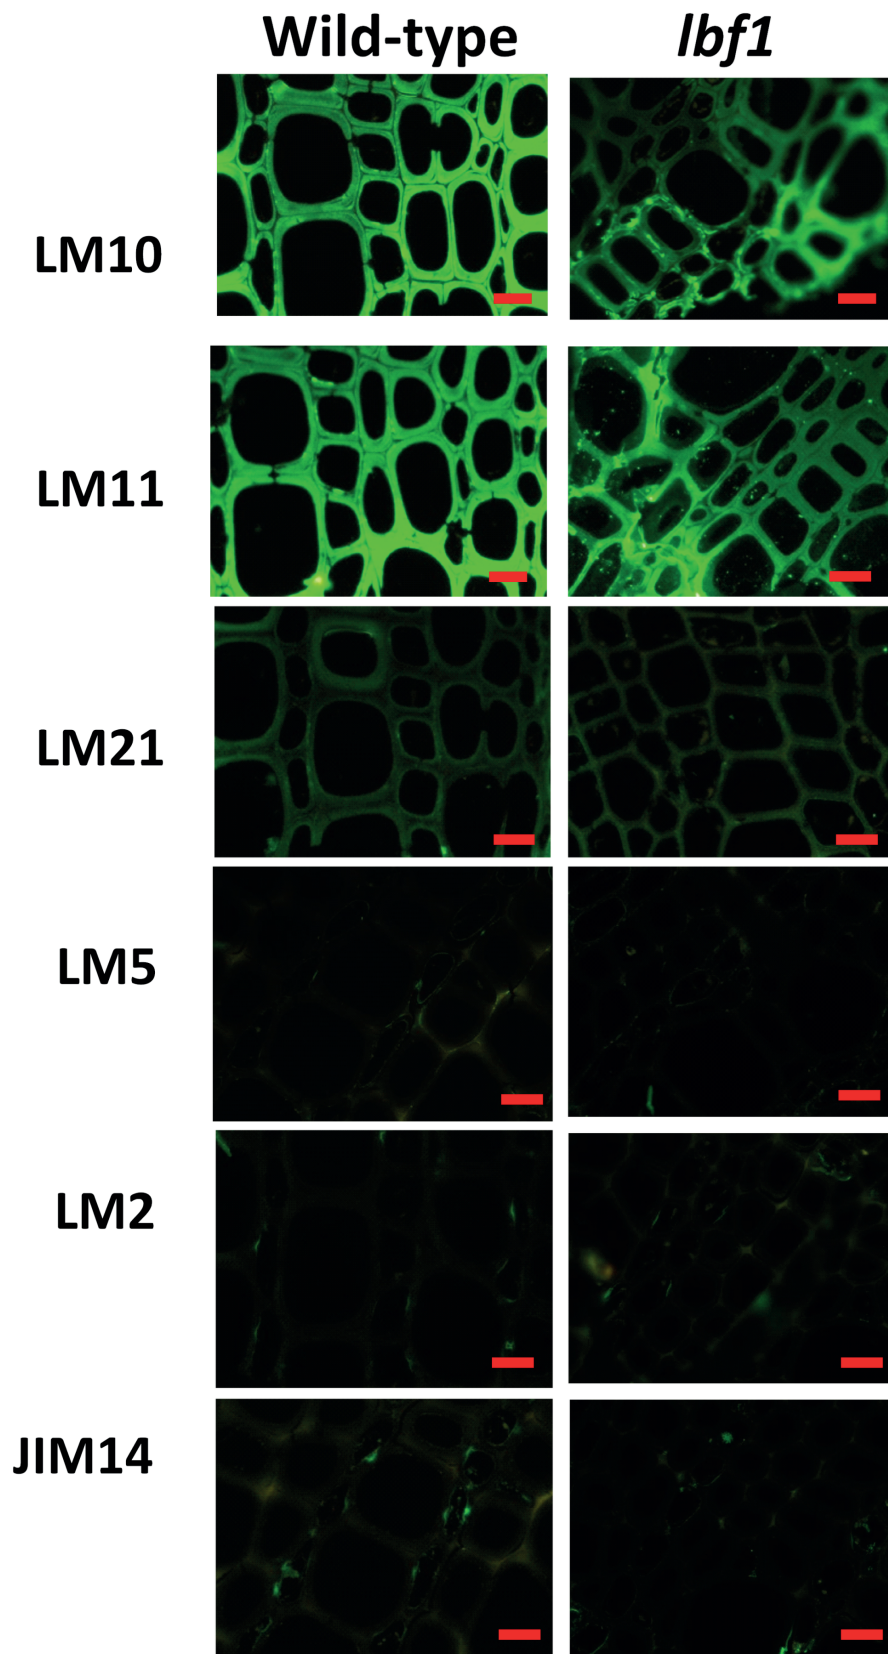

**Supplemental Figure 3** : Fluorescent microscopy immunolocalisation of cell wall NCPs in inner stem tissues of WT (left) and *lbf1* (right) with LM10, LM11, LM21, LM5, LM2 and JIM14 antibodies. Bar : 10  $\mu$ m.





**Supp Table 1:** Visual phenotyping classes for flax *lbf* mutants (Chantreau et al., 2013).

| <b>Category</b>  | <b>Sub-category</b> |
|------------------|---------------------|
| Cotyledon:       | Number              |
|                  | Shape               |
| Hypocotyl:       | Size                |
| Stem:            | Size                |
|                  | Diameter            |
|                  | Colour              |
| Leaf :           | Shape               |
|                  | Colour              |
| Architecture:    | Branching type      |
|                  | Inter-nodes         |
| Flowering/Fruit: | Inflorescence       |
|                  | Petal colour        |
|                  | Reproductive organs |
